# Supplementary material for: Emergence and Spread of a B.1.1.28-Derived P.6 Lineage with Q675H and Q677H Spike Mutations in Uruguay
Source: MDPI journal article supplement (doi:10.3390/v13091801), 2021-09-10

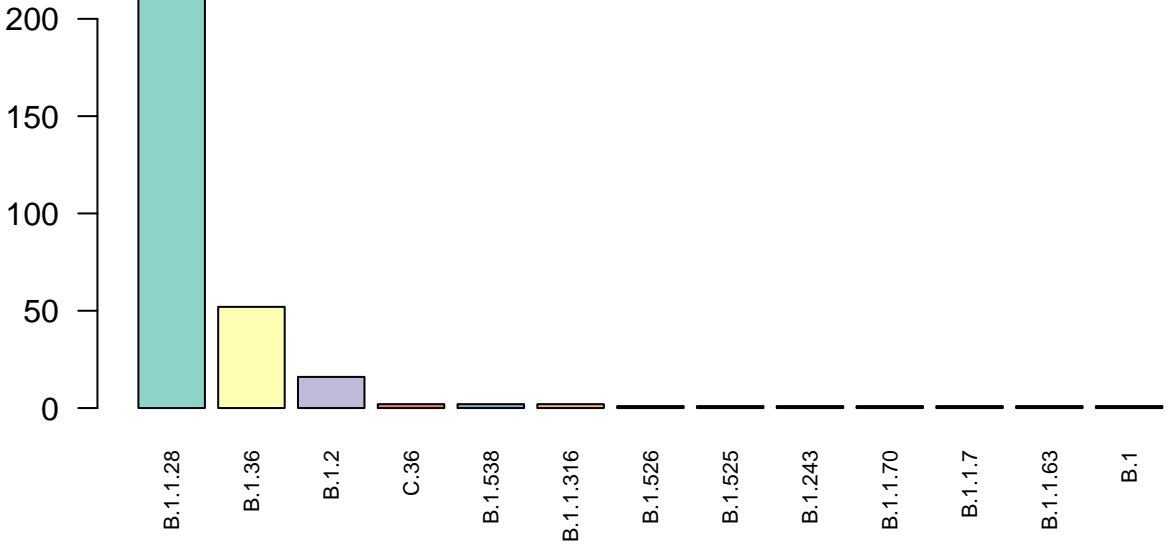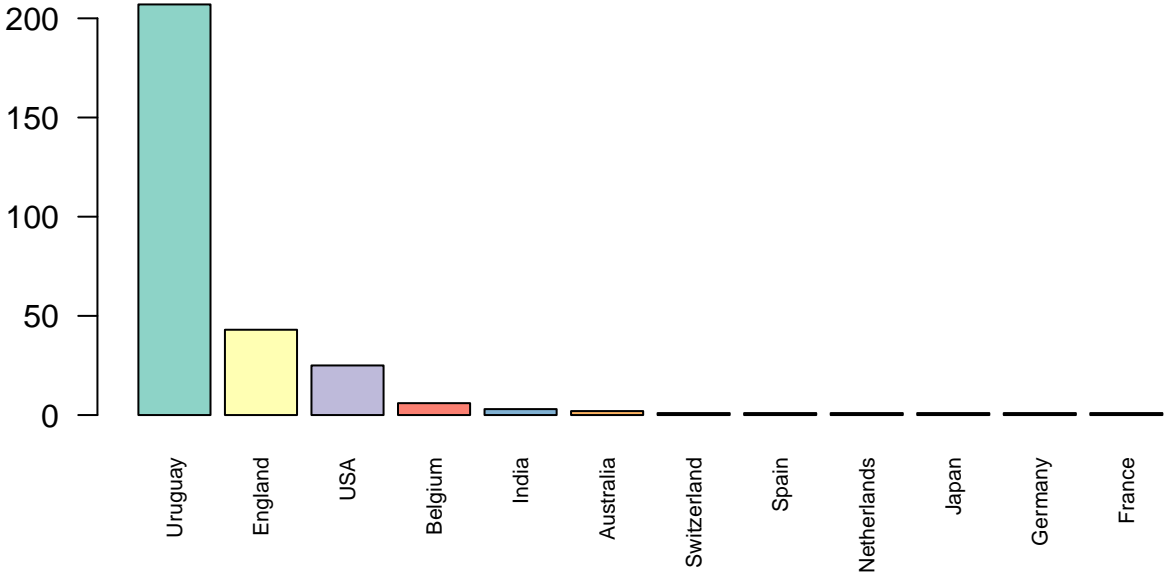

Supplement: s1 [file s1]
