# Supplementary figures and images for: Emergence and Spread of a B.1.1.28-Derived P.6 Lineage with Q675H and Q677H Spike Mutations in Uruguay
Source: MDPI journal article supplement (doi:10.3390/v13091801), 2021-09-10

location

- BR-Central-West
- BR-North
- BR-Northeast
- BR-South
- BR-Southeast
- Uruguay

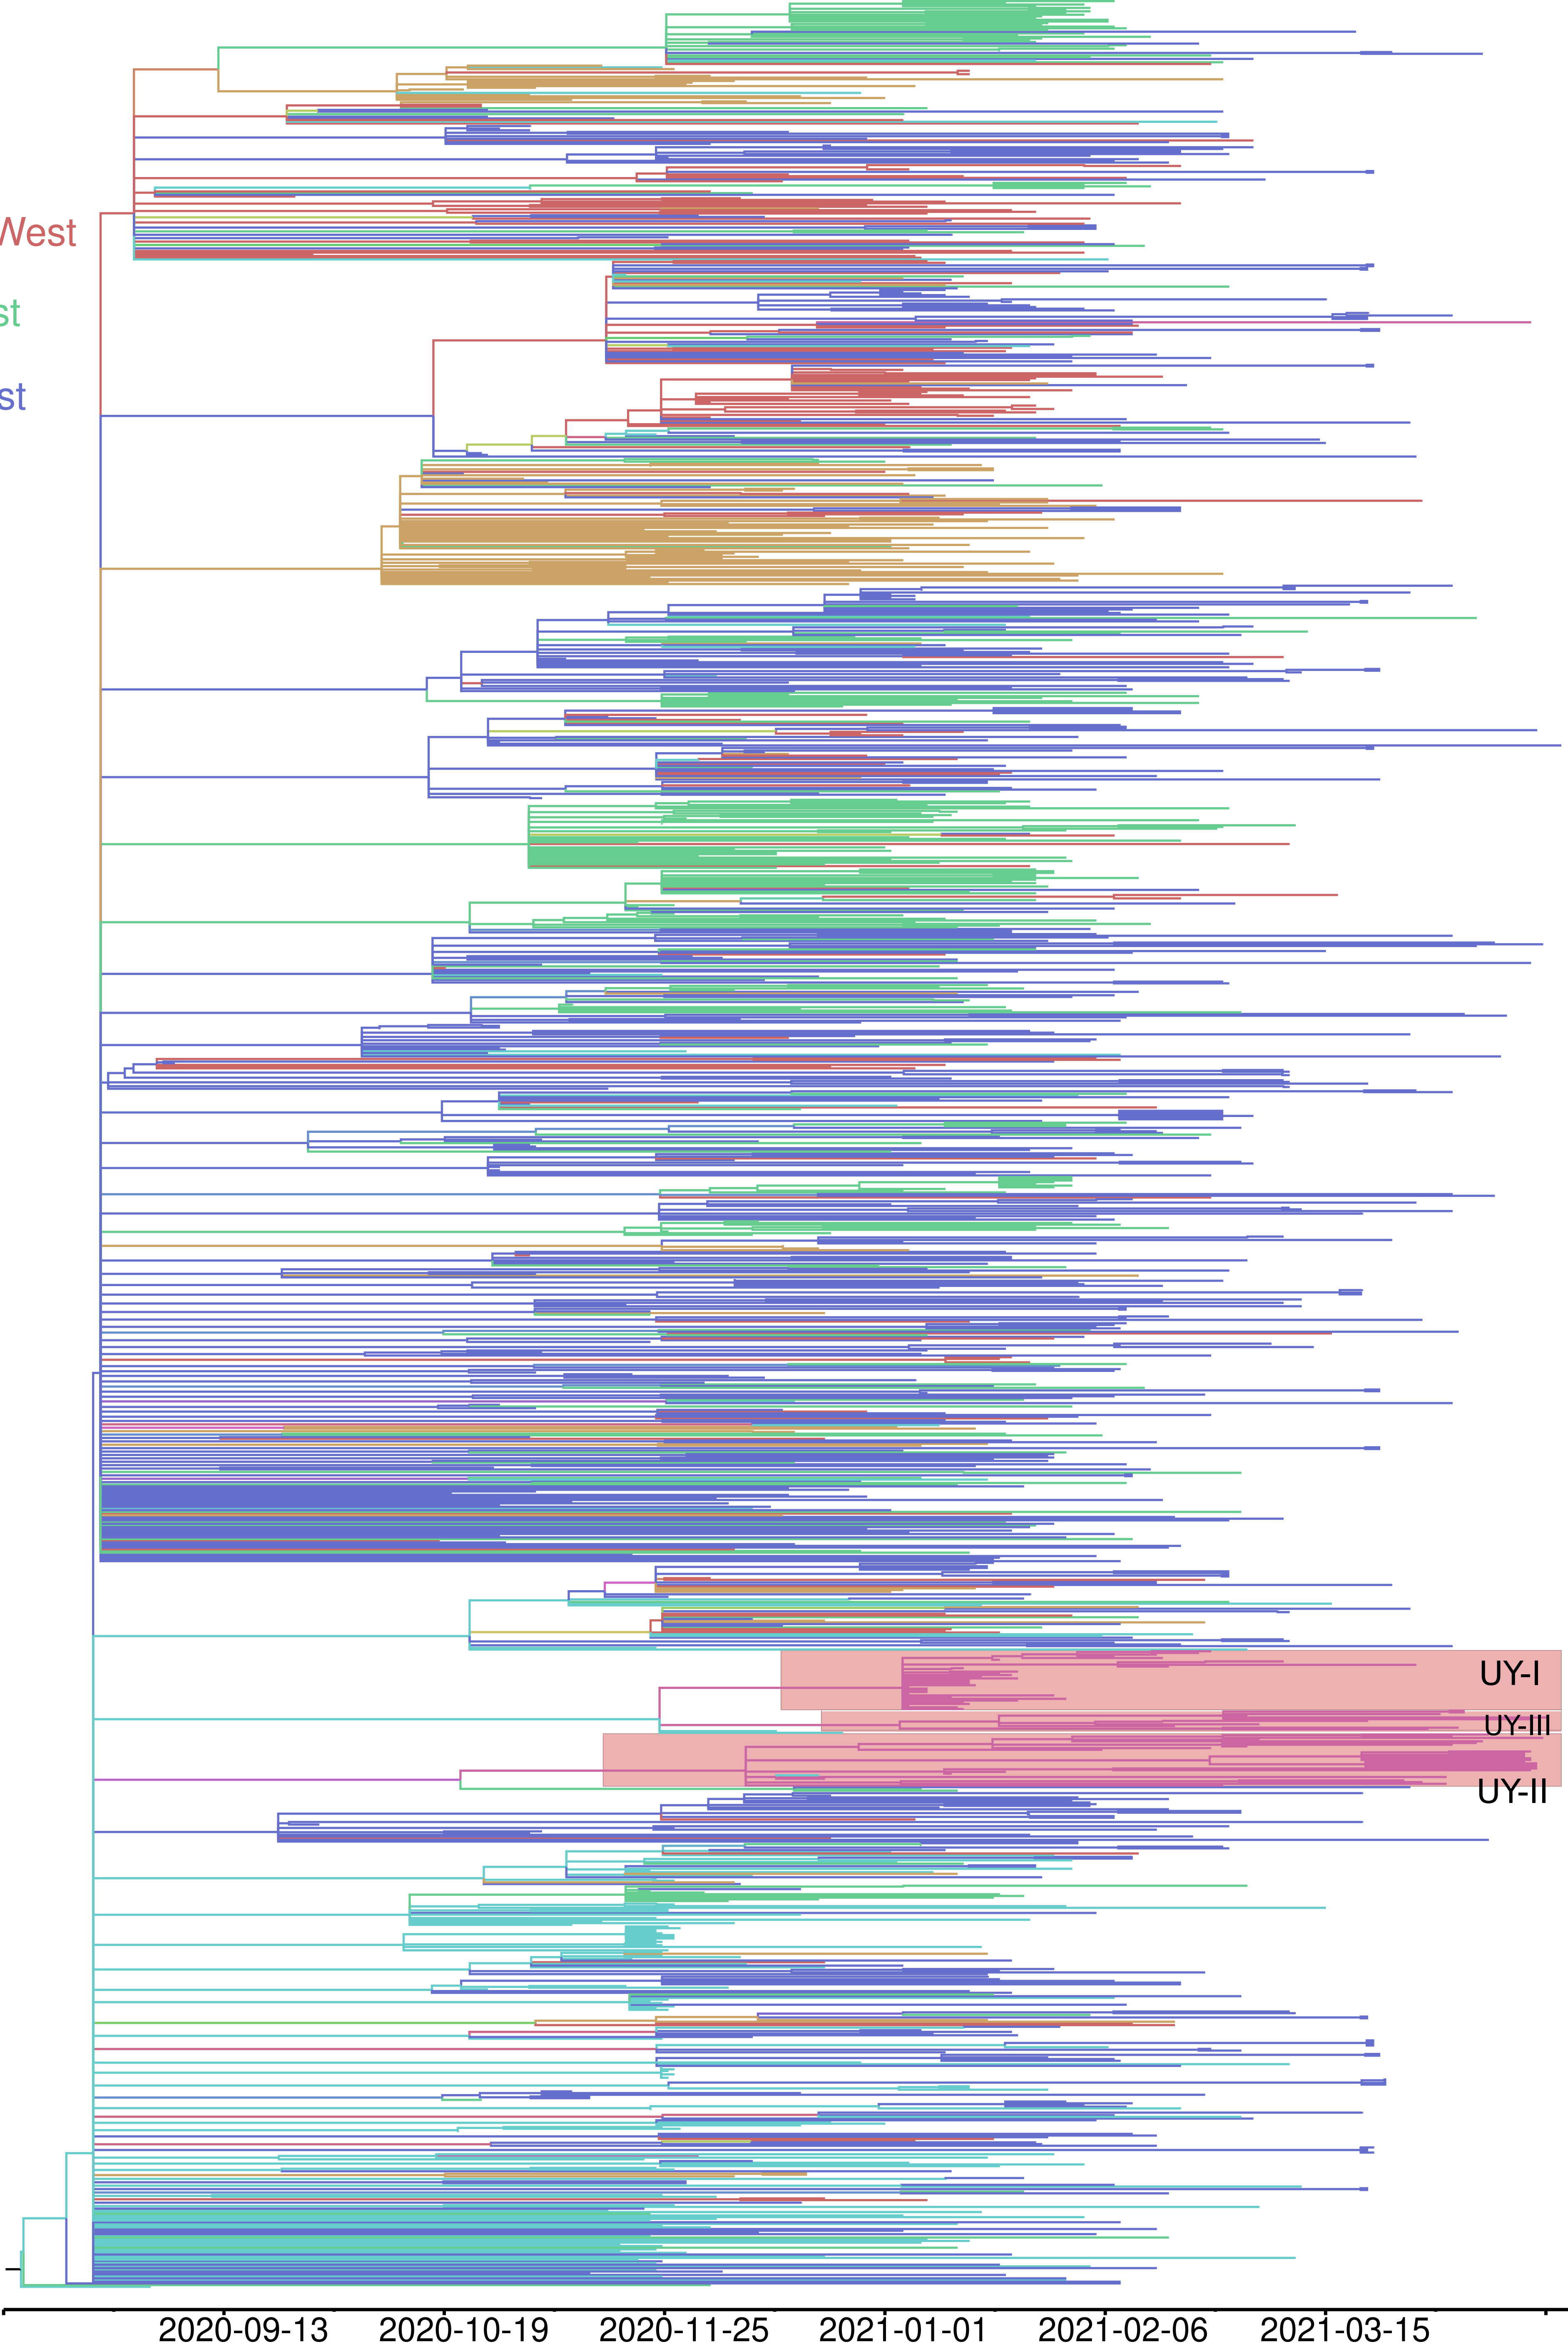

Supplement: s1 [file s1]

A

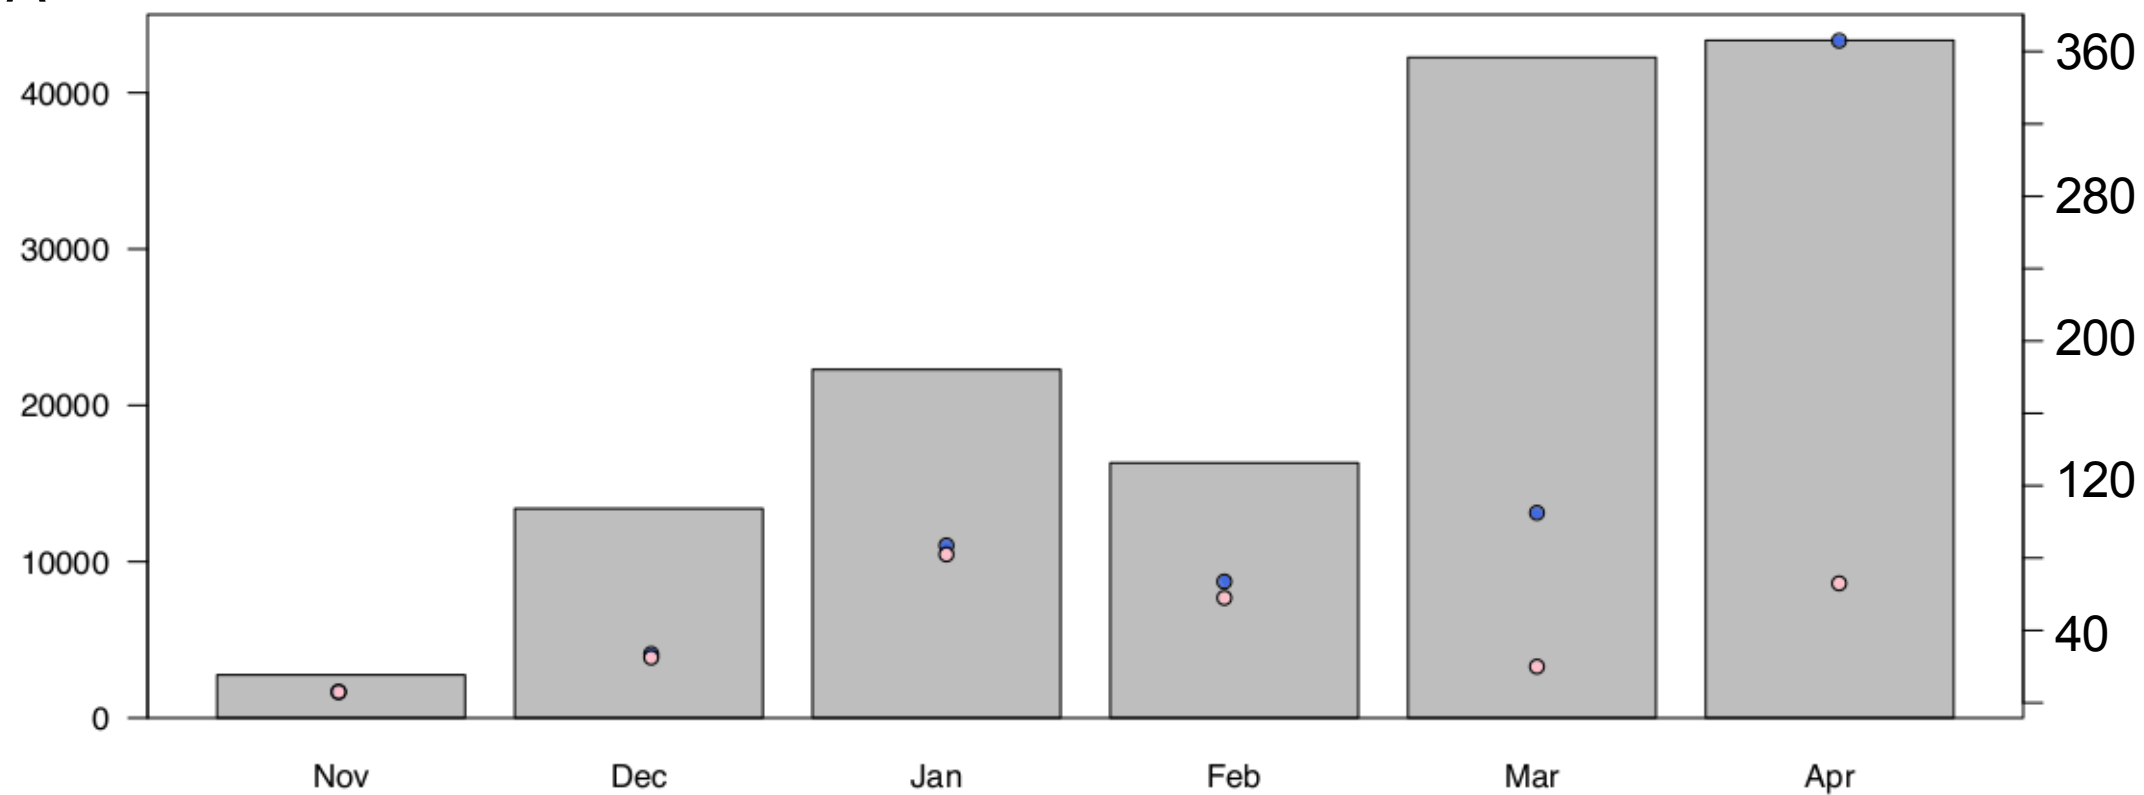

B

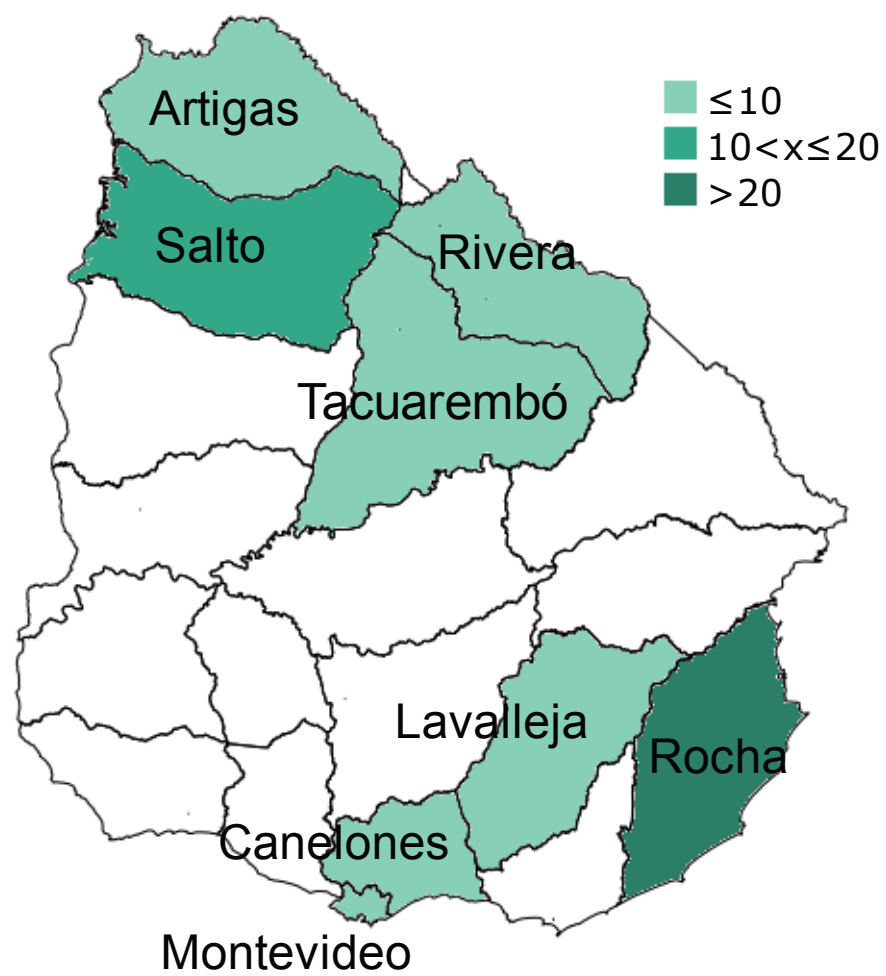

C

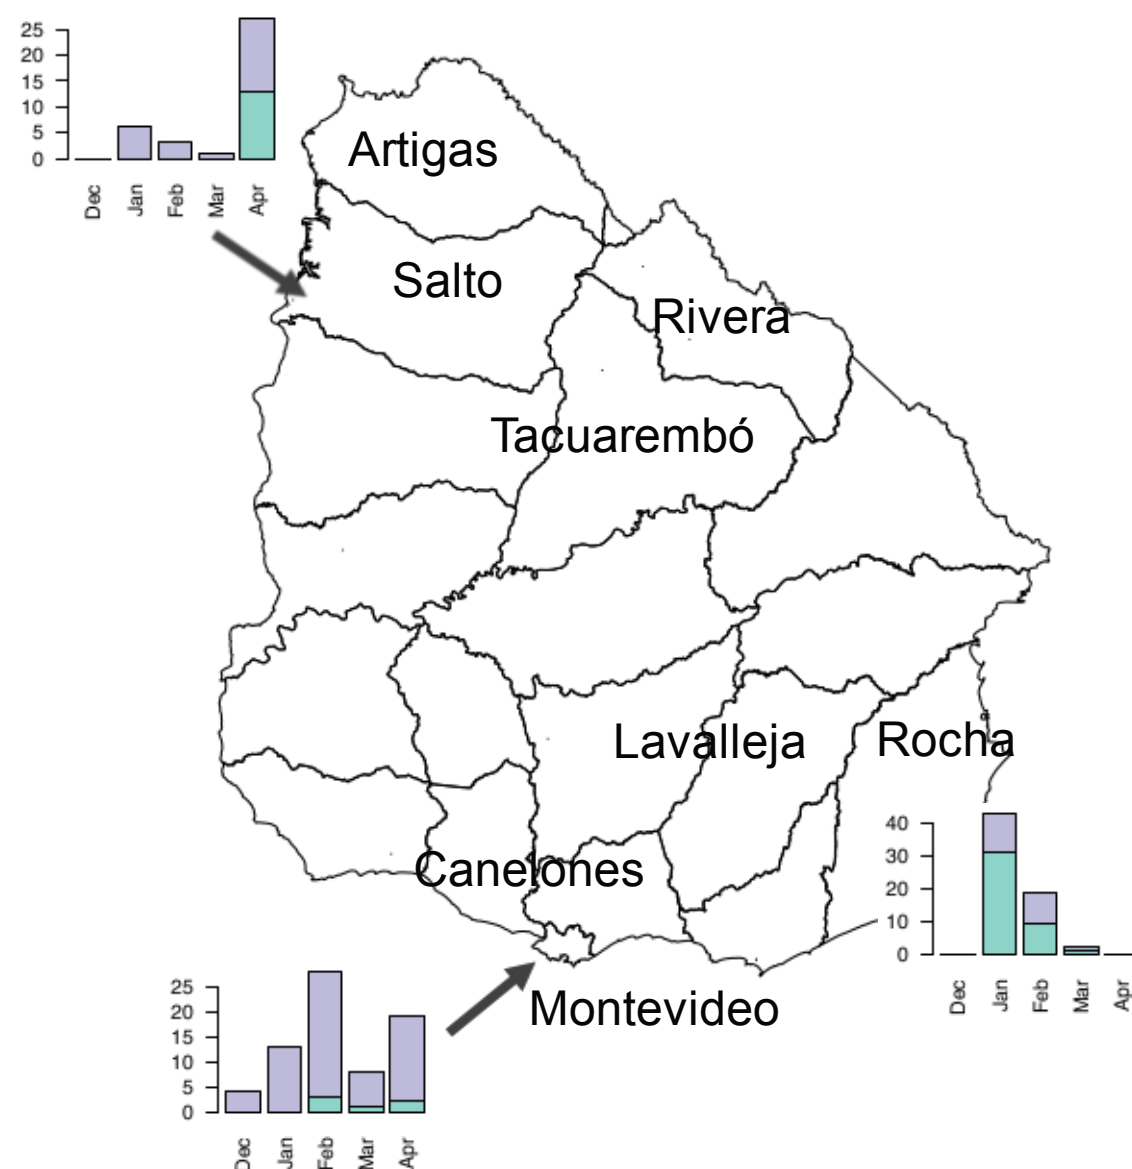

Supplement: s1 [file s1]
